# Supplementary material for: 2D MXene electrochemical transistors
Source: Royal Society of Chemistry journal article supplement (doi:10.1039/d3nr06540e), 2024-01-01
Supplement: d3nr06540e1.pdf [file d3nr06540e1.pdf]

## Supporting Information

# 2D MXene Electrochemical Transistors

Jyoti Shakya<sup>a†</sup>, Min-A Kang<sup>a,b,†</sup>, Jian Li<sup>a</sup>, Armin VahidMohammadi<sup>c</sup>, Weiqian Tian<sup>a,d\*</sup>, Erica Zeglio<sup>e,f\*</sup>  
Mahiar Max Hamedj<sup>a\*</sup>

<sup>a</sup> Department of Fibre and Polymer Technology, KTH Royal Institute of Technology, Teknikringen 56, 10044 Stockholm, Sweden

<sup>b</sup> Department of Materials Science and Engineering, Northwestern University, Evanston, IL 60208, USA

<sup>c</sup> A. J. Drexel Nanomaterials Institute and Department of Materials Science and Engineering, Drexel University, Philadelphia, PA 19104, USA

<sup>d</sup> School of Materials Science and Engineering, Ocean University of China, Qingdao, Shandong 266100, China; [orcid.org/0000-0003-3497-2054](https://orcid.org/0000-0003-3497-2054)

<sup>e</sup> Division of Nanobiotechnology, Department of Protein Science, Science for Life Laboratory, School of Engineering Sciences in Chemistry, Biotechnology and Health, KTH Royal Institute of Technology and Digital Futures, Solna, Sweden.

<sup>f</sup> Center for the Advancement of Integrated Medical and Engineering Sciences (AIMES), Karolinska Institutet and KTH Royal Institute of Technology, 171 77, Stockholm, Sweden

† Equal contribution

E-mail: [mahiar@kth.se](mailto:mahiar@kth.se), [zeglio@kth.se](mailto:zeglio@kth.se), [tianweiqian@ouc.edu.cn](mailto:tianweiqian@ouc.edu.cn)

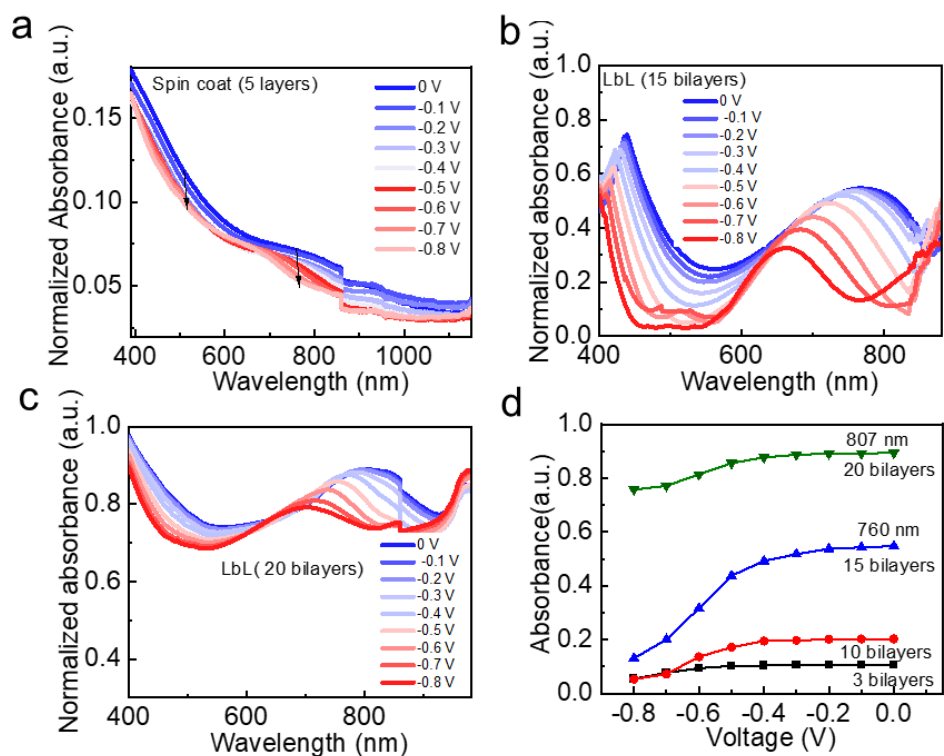

**Figure S1.** UV-vis spectroelectrochemical measurements of (a) spin-coated MXene (5 layers), (b) LbL-assembled 15 bilayers, (c) LbL-assembled 20 bilayers (d) A comparison of changes in absorption maxima for LbL-assembled films. The absorption maxima were 760 nm for all the films except for the film with 20 bilayers, for which it was 807 nm.

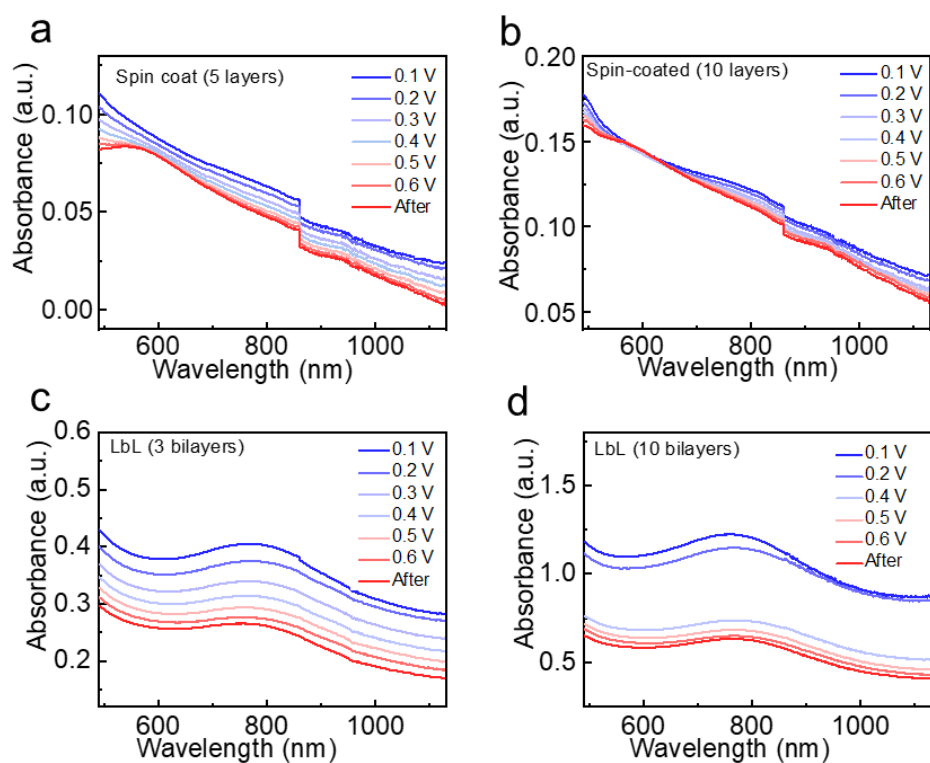

**Figure S2.** UV-vis spectral absorbance for oxidation of (a) Spin coated (5 layers) (b) Spin coated (10 layers) (c) LbL (3 bilayers) (d) LbL (10 bilayers).

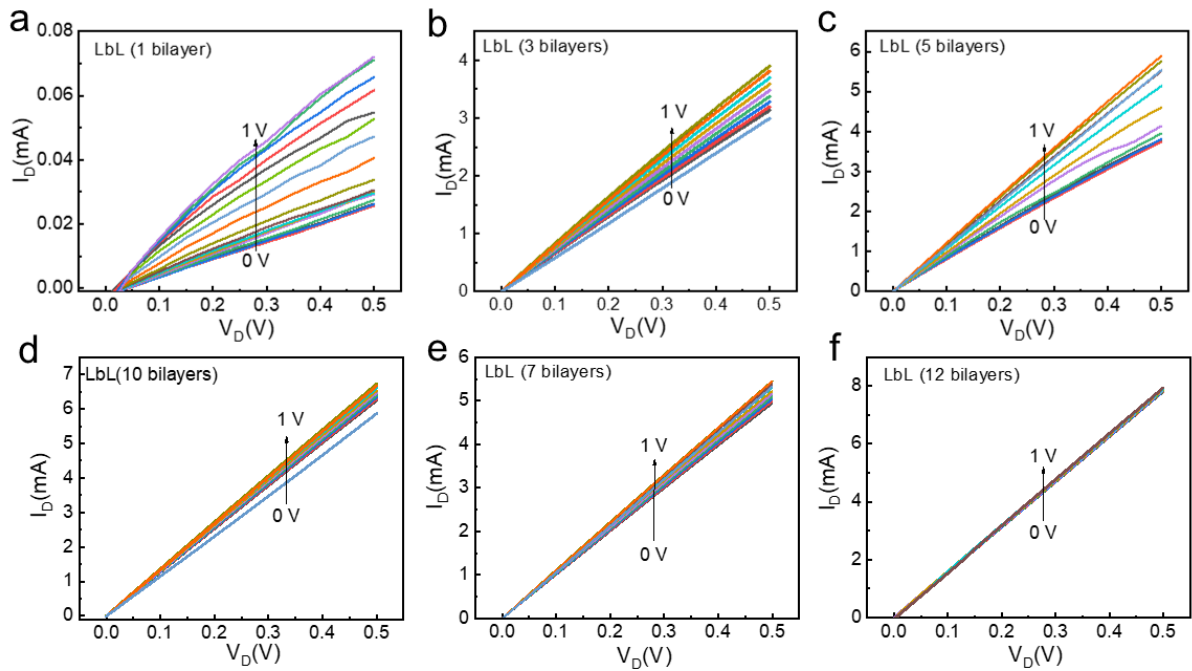

**Figure S3.** Output curves of MXene ECTs having LbL assembled MXene films as channels (a) 1 bilayer (b) 3 bilayers (c) 5 bilayers (d) 7 bilayers (e) 10 bilayers and (f) 12 bilayers measured for gate voltages ranging from 0 to 1 V.

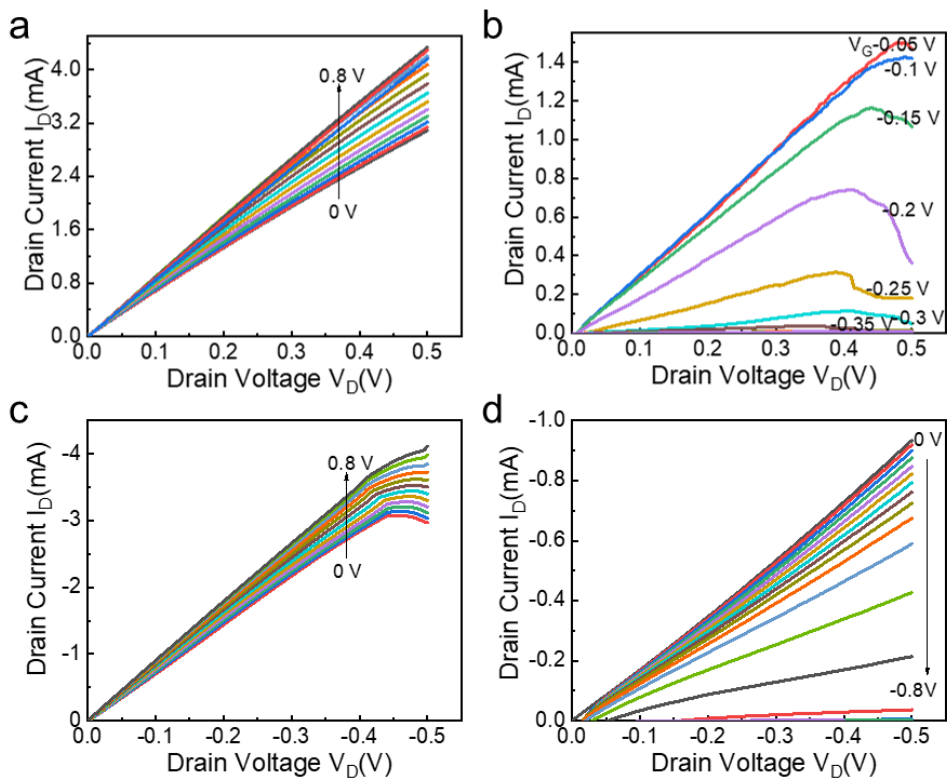

**Figure S4.** Output characteristics of MXene ECTs at positive drain voltages and gate voltages from (a) 0 to 0.8 V and (b) 0 to -0.35 V and negative drain voltages and gate voltages from (c) 0 V to 0.8 V and (d) 0V to -0.8 V.

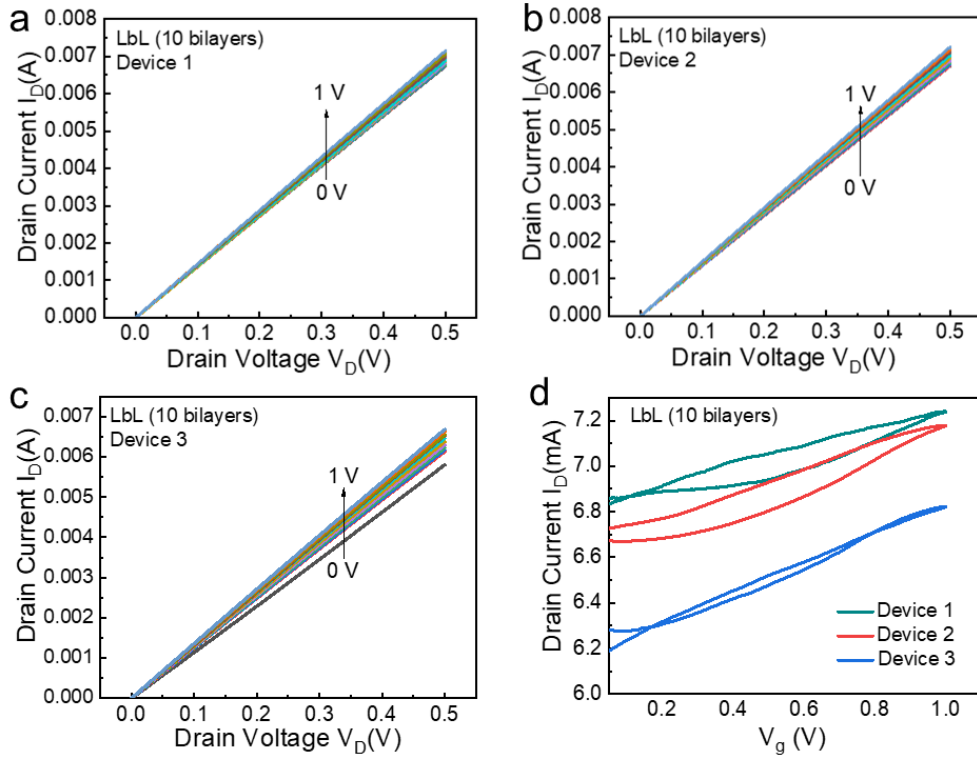

**Figure S5.** Device variability: Electrical characteristics of MXene ECT devices having LbL (10 Layers) assembled MXene films as channels. (a, b, c) Output curves for various ECT devices measured for gate voltages ranging from 0 to 1 V. (d) A comparison of corresponding transfer curves for devices 1, 2 and 3.

**Table S1.** Summary of MXene ECTs parameters. We have measured 3 devices (Channel dimensions,  $L = 20 \mu\text{m}$ ,  $W = 1000 \mu\text{m}$  for each 1, 3, 5, 7, 10 and 12 bilayers)

| LbL bilayers | Thickness [nm] <sup>a)</sup> | $V_{\text{TH}}$ [V] <sup>b)</sup> | Average maximum Transconductance $g_{\text{m,max}}$ [mS] <sup>c)</sup> | Areal Capacitance [mF] <sup>d)</sup> | $\mu$ [ $\text{cm}^2\text{V}^{-1}\text{s}^{-1}$ ] <sup>e)</sup> |
|--------------|------------------------------|-----------------------------------|------------------------------------------------------------------------|--------------------------------------|-----------------------------------------------------------------|
| 1            | 08.79                        | 0.20                              | $0.07 \pm 0.06$                                                        | -                                    | 0.008                                                           |
| 3            | 26.38                        | 0.20                              | $2.19 \pm 1.20$                                                        | $1.8 \pm 0.09$                       | 0.030                                                           |
| 5            | 43.97                        | 0.20                              | $2.76 \pm 2.01$                                                        | $5.0 \pm 0.25$                       | 0.036                                                           |
| 7            | 61.55                        | 0.27                              | $1.82 \pm 0.41$                                                        | $8.1 \pm 0.40$                       | 0.014                                                           |
| 10           | 87.94                        | 0.35                              | $0.79 \pm 0.08$                                                        | $11.4 \pm 0.57$                      | 0.008                                                           |
| 12           | 105.5                        | 0.28                              | $0.32 \pm 0.11$                                                        | -                                    | 0.002                                                           |

a) Extracted from Field Emission Scanning Electron Microscope (FESEM)<sup>17</sup>

b) Determined using extrapolation in the linear region method

c) Extracted from transfer curves

d) Areal capacitance extracted from cyclic voltammetry using equation (2)

e) Estimated using equation (1)

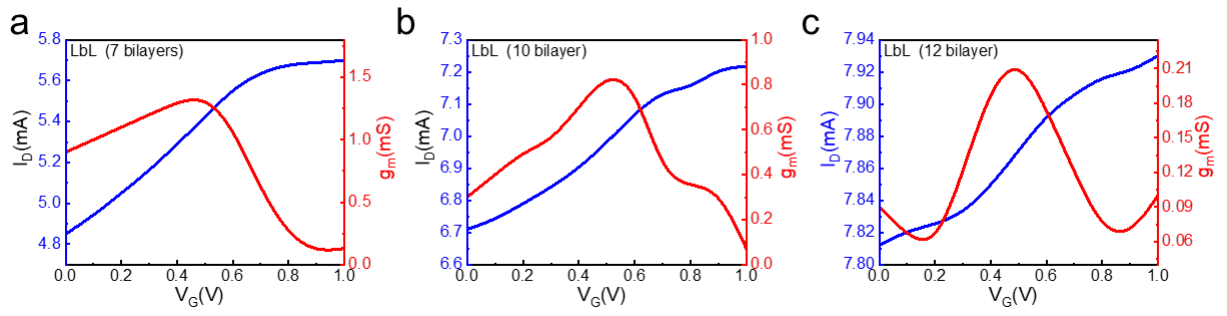

**Figure S6.** Transfer curves and the corresponding normalized transconductance plotted with respect to the gate voltages at  $V_D = 0.5$  V, for LbL-assembled different layers of MXene (a) 7 bilayers, (b) 10 bilayers and (c) 12 bilayers.

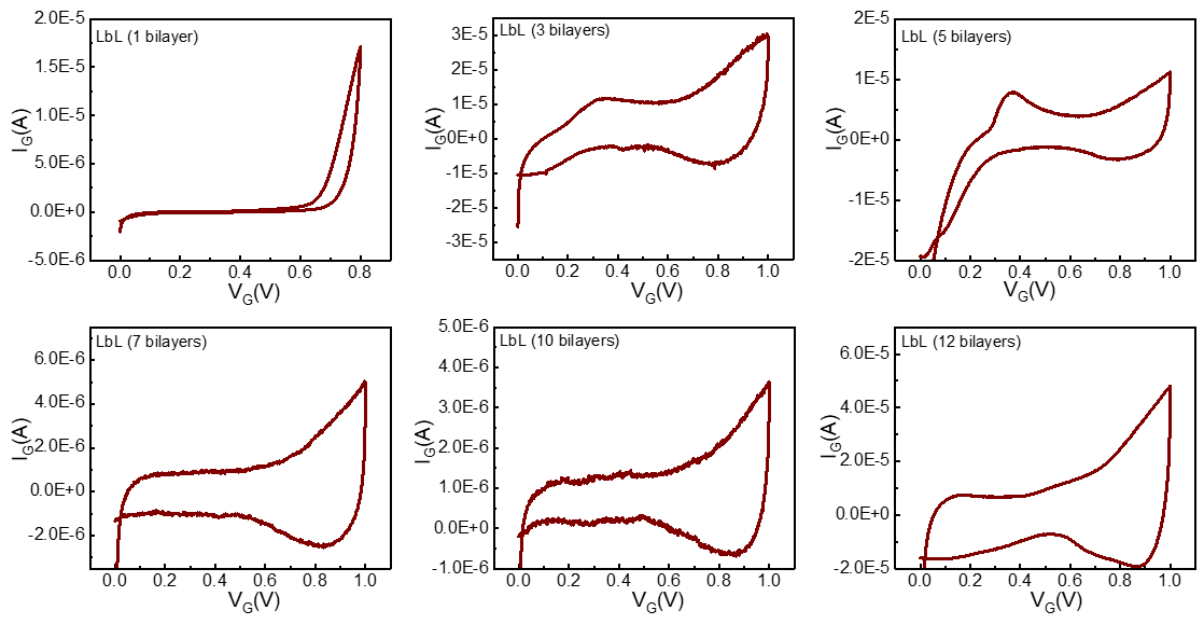

**Figure S7.** Gate currents for MXene ECTs with 1, 3, 5, 7, 10 and 12 bilayers at fix  $V_D = 0.5$  V and  $V_G$  from 0 to 0.8 V.

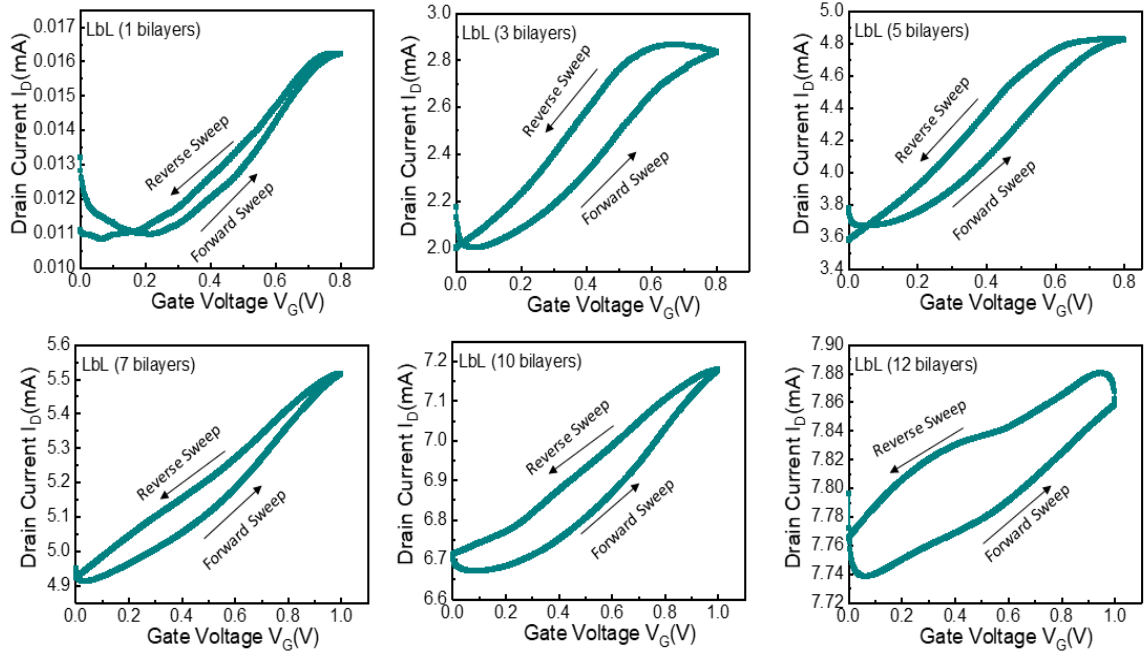

**Figure S8.** Transfer curves for MXene ECT (a) 1, (b) 3, (c) 5, (d) 7, (e) 10 and (f) 12 bilayers at  $V_D = 0.5V$  and  $V_G$  from 0 to 0.8V.

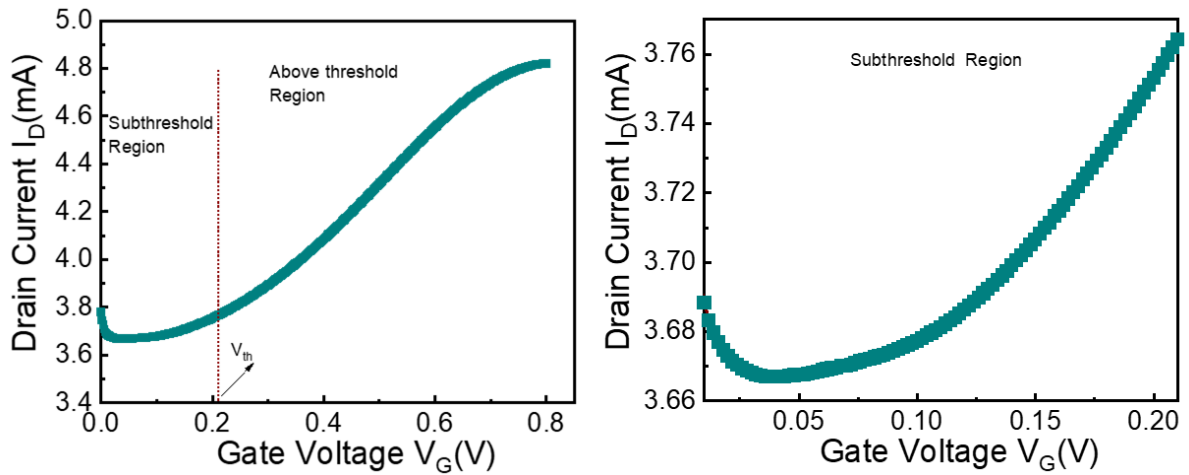

**Figure S9.** Subthreshold region of MXene LbL (5 bilayers device) bilayers at  $V_D = 0.5V$  and  $V_G$  from 0 to 0.8V.

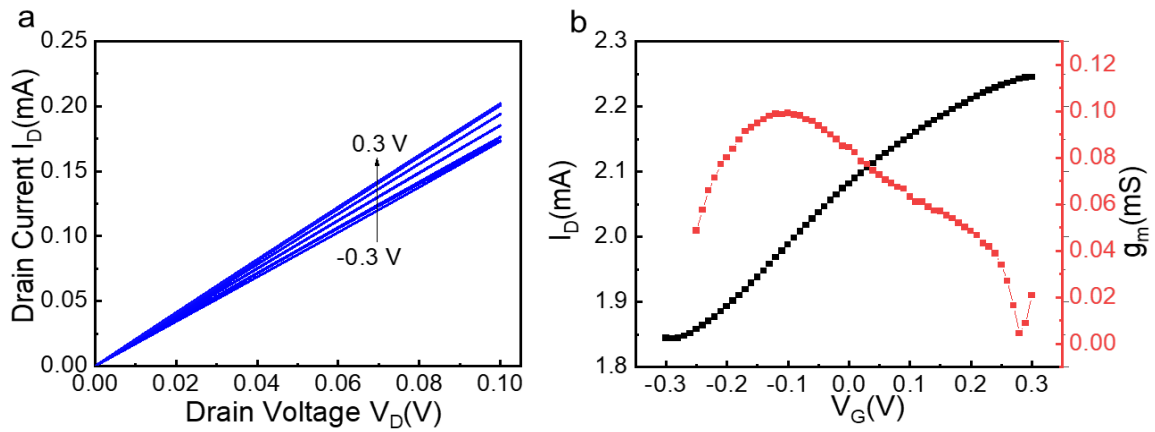

**Figure S10.** Output curve (a) for spin coated MXene ECTs, measured for gate voltages ranging from -0.3V to 0.3V. Corresponding transfer curves and calculated transconductance values (b) measured at  $V_D = 0.5$  V.

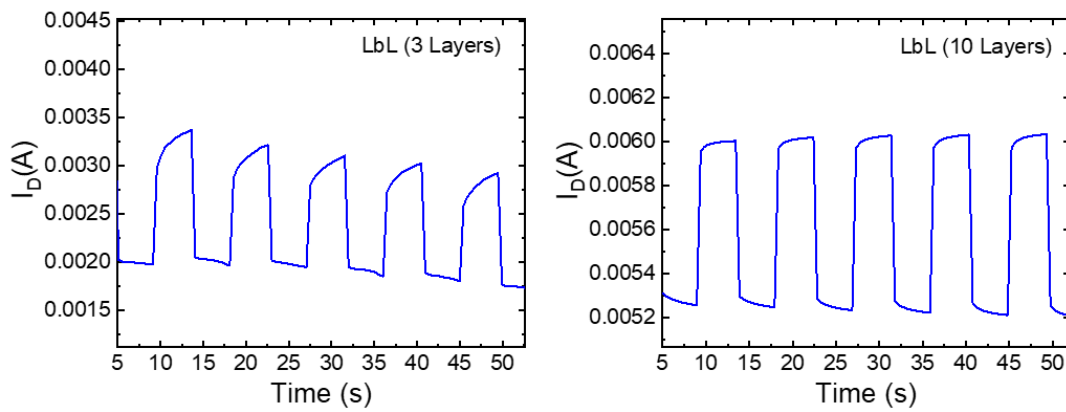

**Figure S11.** The transient response of the channel current ( $V_D = 0.5$ V,  $V_G = 1$ V) of LbL (3 bilayers) and LbL (10 bilayers)

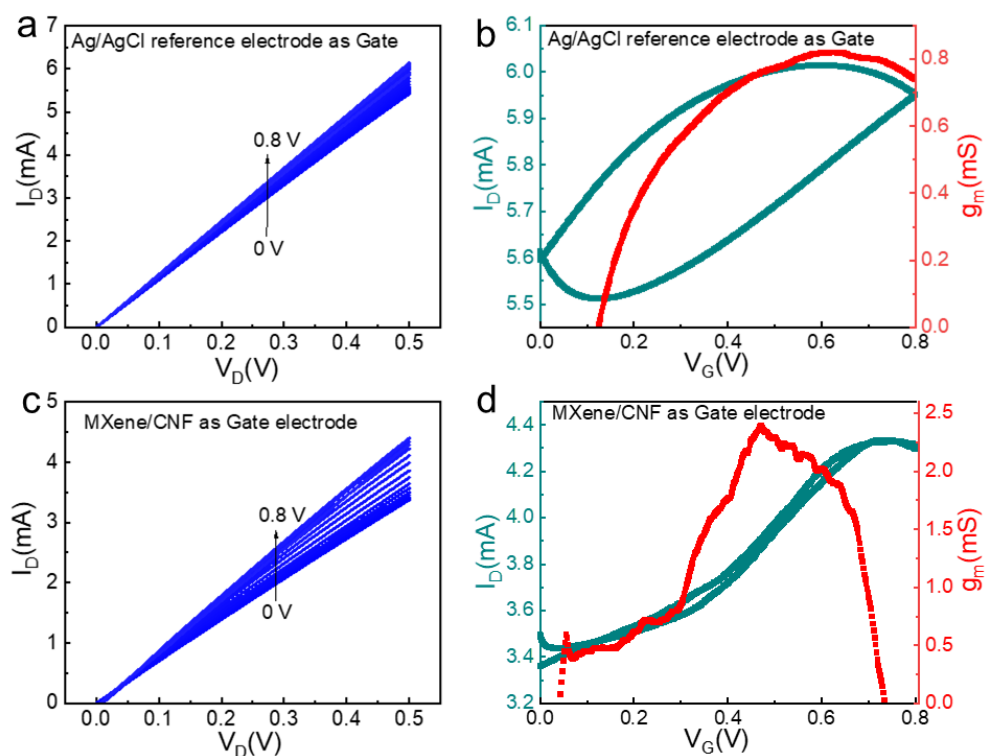

**Figure S12.** Channel gating with different gate electrode: Output and transfer characteristics of 5 bilayers of MXene using (a, b) Ag/AgCl reference electrode (3 M KCl aqueous solution), and (c, d) MXene-CNF membrane at  $V_D = 0.5$  V and  $V_G$  from 0 to 0.8 V

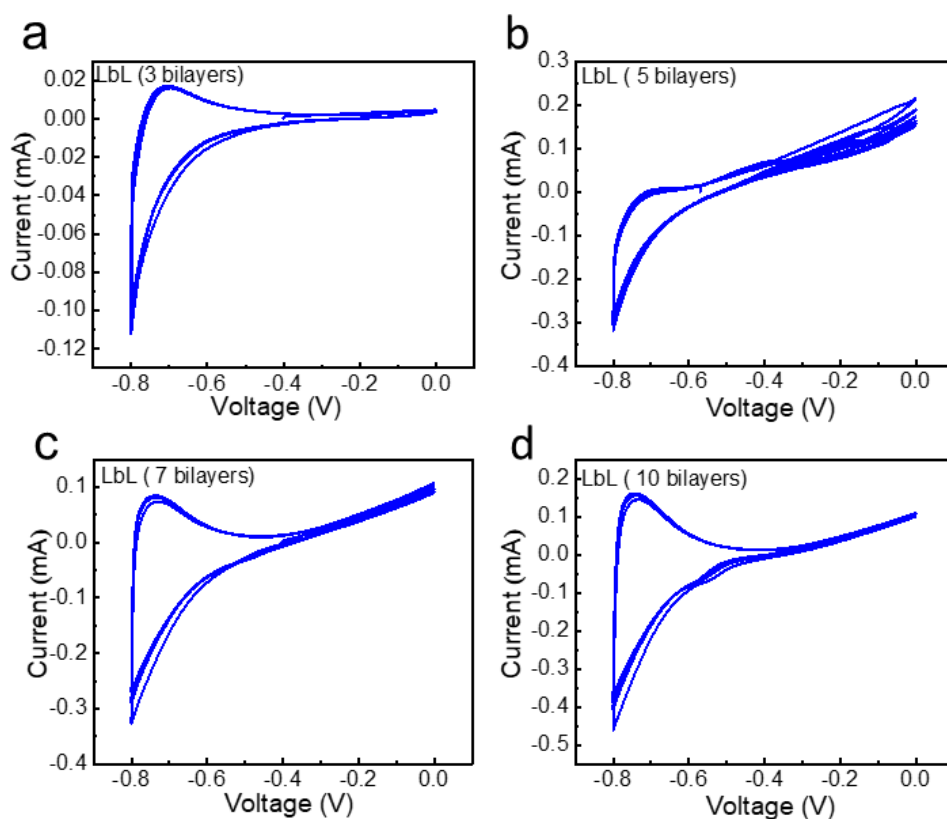

**Figure S13.** Cyclic voltammograms of (a) 3 (b) 5, (c) 7 and (d) 10 bilayers of LbL assembled MXene. All measurements were performed using a three-electrode setup with an Ag/AgCl pellet acting as a pseudo-reference electrode.



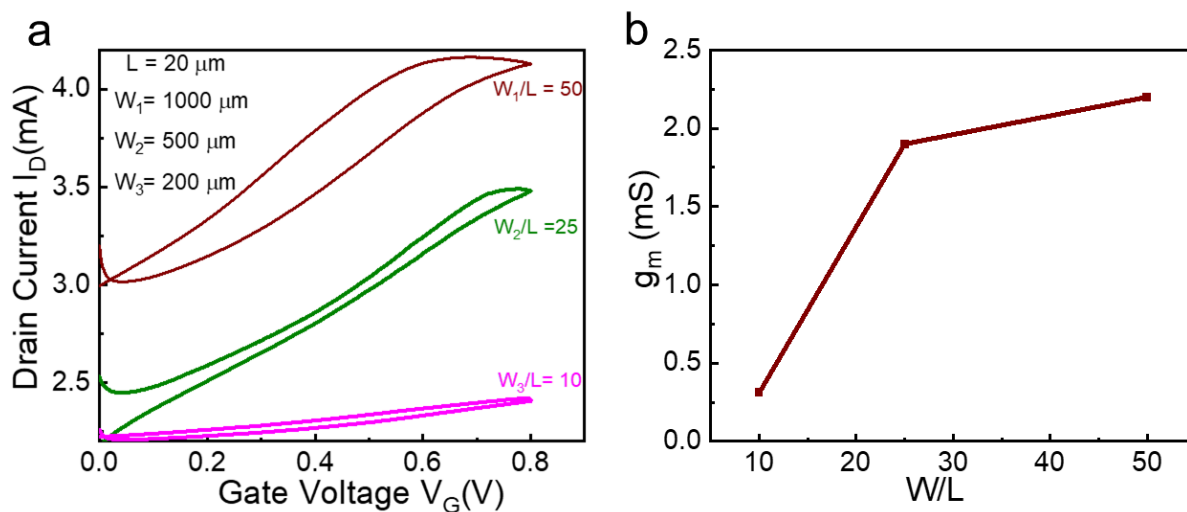

**Figure S14.** (a) Transfer characteristics of 5 bilayers MXene coated on the channel with width 1000  $\mu\text{m}$ , 500  $\mu\text{m}$  and 200  $\mu\text{m}$  at  $V_D = 0.5\text{V}$  and  $V_G = 0$  to 0.8 V. (b) Corresponding transconductance.

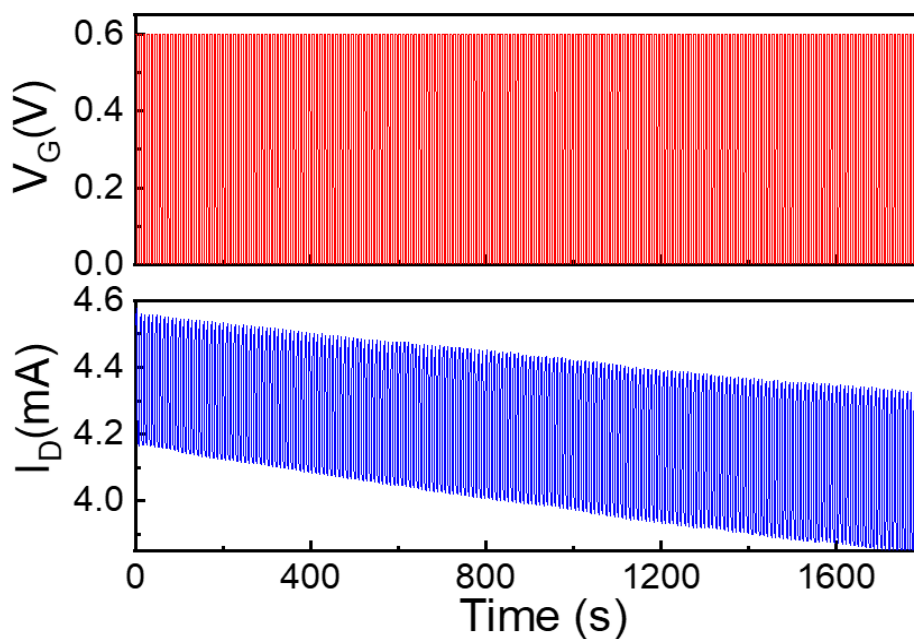

**Figure S15.** Stability test for 5 bilayer MXene ECTs under sequential square wave gate voltage pulse for 30 min, at  $V_D = 0.5 \text{ V}$ , and  $V_G$  from 0 to 0.6 V.

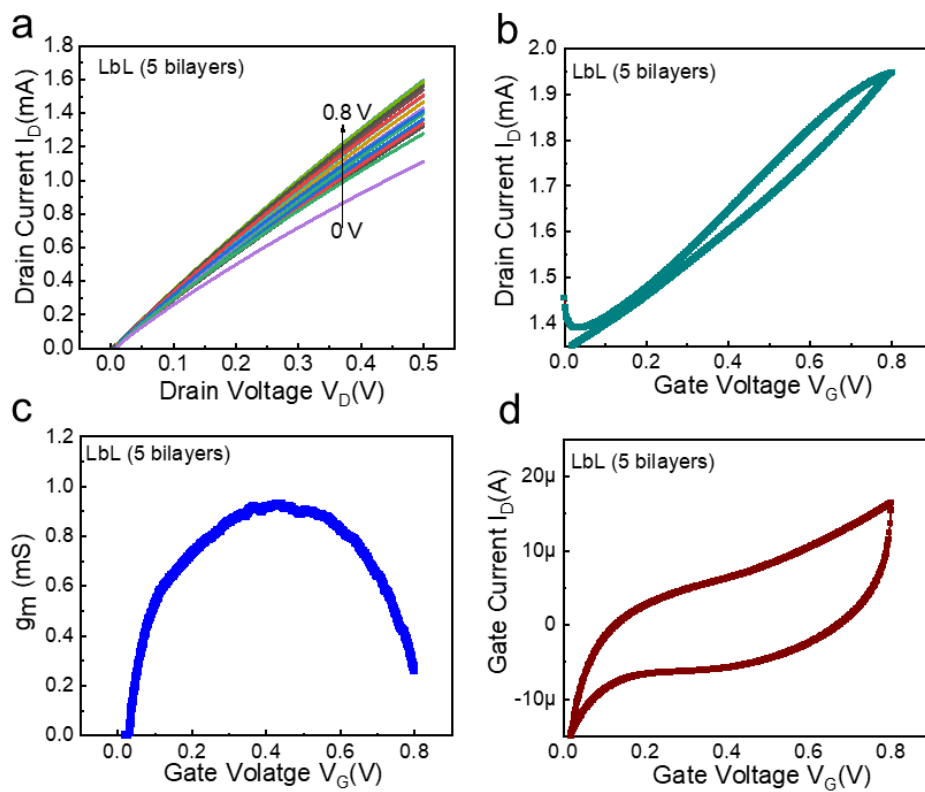

**Figure S16.** (a) Output curves at  $V_D$  from 0 to 0.5 V and  $V_G$  from 0 to 0.8 V. (b) Transfer curves at  $V_D = 0.5$  V and  $V_G$  from 0 to 0.8 V. (c) Transconductance plot and (d) gate current for MXene ECTs devices having LbL assembled 5 bilayers as channel in 0.1 M NaCl aqueous electrolyte at  $V_D = 0.5$  V and  $V_G$  from 0 to 0.8 V.
